# Supplementary material
Source: PubMed Central journal article supplement (PMC3616494)
Supplement: NIHMS91050-supplement-1_si_001.pdf [file NIHMS91050-supplement-1_si_001.pdf]

## Supporting Information

### Structure-Activity Relationships of Truncated D- and L-4'-Thioadenosine Derivatives as Species-Independent A<sub>3</sub> Adenosine Receptor Antagonists

Lak Shin Jeong<sup>1,\*</sup>, Shantanu Pal,<sup>1</sup> Seung Ah Choe,<sup>1</sup> Won Jun Choi,<sup>1</sup> Kenneth A. Jacobson,<sup>2</sup> Zhan-Guo Gao,<sup>2</sup> Athena M. Klutz,<sup>2</sup> Xiyan Hou,<sup>1</sup> Hea Ok Kim,<sup>1</sup> Hyuk Woo Lee,<sup>1</sup> Sang Kook Lee,<sup>1</sup> Dilip K. Tosh,<sup>1</sup> and Hyung Ryong Moon<sup>3</sup>

<sup>1</sup>Laboratory of Medicinal Chemistry, College of Pharmacy, Ewha Womans University, Seoul 120-750, Korea, <sup>2</sup>Molecular Recognition Section, Laboratory of Bioorganic Chemistry, National Institute of Diabetes & Digestive & Kidney Diseases, National Institutes of Health, Bethesda, MD 20892, USA, and <sup>3</sup>College of Pharmacy, Pusan National University, Busan 609-753, Korea

\*Corresponding Author: Tel) 82-2-3277-3466; Fax) 82-2-3277-2851  
E-mail) lakjeong@ewha.ac.kr

### Content

|                              |       |
|------------------------------|-------|
| Pharmacological methods----- | S2-S7 |
| Elemental Analyses Data----- | S4    |

## Pharmacological Methods

[<sup>125</sup>I]N<sup>6</sup>-(4-amino-3-iodobenzyl)adenosine-5'-N-methyluronamide (I-AB-MECA; 2000 Ci/mmol), [<sup>3</sup>H]CCPA (2-chloro-N<sup>6</sup>-cyclopentyladenosine, 42.6 Ci/mmol), [<sup>3</sup>H]CGS21680 (2-[p-(2-carboxyethyl)phenylethylamino]-5'-N-ethylcarboxamido-adenosine, 47 Ci/mmol) and [<sup>3</sup>H]cyclic AMP (40 Ci/mmol) were from Amersham Pharmacia Biotech (Buckinghamshire, UK).

## Cell culture and membrane preparation

Adherent mammalian cells stably transfected with cDNA encoding the appropriate human AR were cultured in DMEM supplemented with 10% fetal bovine serum, 100 Units/mL penicillin, 100 µg/mL streptomycin, 2 µmol/mL glutamine and 800 µg/mL geneticin. The recombinant A<sub>1</sub>, A<sub>2B</sub>, and A<sub>3</sub> ARs were expressed in CHO (Chinese hamster ovary) cells (Klotz *et al.*, *Naunyn-Schmiedeberg's Arch. Pharmacol.* **1998**, 357, 1-9) and the A<sub>2A</sub> AR in HEK-293 (human embryonic kidney) cells (Kim *et al.*, *J. Med. Chem.* **2000**, 43, 1165-1172). Cells were harvested by trypsinization. After homogenization and suspension, cells were centrifuged at 500 g for 10 min, and the pellet was re-suspended in 50 mM Tris·HCl buffer (pH 7.4) containing 10 mM MgCl<sub>2</sub>. The suspension was homogenized with an electric homogenizer for 10 sec, and was then re-centrifuged at 20,000 g for 20 min at 4 °C. The resultant pellets were resuspended in buffer in the presence of 3 units/mL adenosine deaminase, and the suspension was stored at -80 °C until the binding experiments. The protein concentration was measured using the Bradford assay (Bradford *et al.*, *Anal. Biochem.* **1976**, 72, 248-254).

## Cyclic AMP accumulation assay

Intracellular cyclic AMP levels were measured with a competitive protein binding method.<sup>18,19</sup> CHO cell that expressed recombinant the human or rat A<sub>3</sub>AR or the human A<sub>1</sub> or A<sub>2B</sub>AR were harvested by trypsinization. After centrifugation and resuspended in medium, cells were planted in 24-well plates in 1.0 mL medium. After 24 h, the medium was removed and cells were washed three times with 1 mL DMEM, containing 50 mM HEPES, pH 7.4. Cells were then treated with agonists and/or test compounds in the presence of rolipram (10 µM) and adenosine deaminase (3 units/mL). After 45 min forskolin (10 µM) was added to the medium, and incubation was continued an additional 15 min. The reaction was terminated by removing the supernatant, and cells were lysed upon the addition of 200 µL of 0.1 M ice-cold HCl. The cell lysate was resuspended and stored at -20°C. For determination of cyclic AMP production, protein

kinase A (PKA) was incubated with [<sup>3</sup>H]cyclic AMP (2 nM) in K<sub>2</sub>HPO<sub>4</sub>/EDTA buffer (K<sub>2</sub>HPO<sub>4</sub>, 150 mM; EDTA, 10 mM), 20 μL of the cell lysate, and 30 μL 0.1 M HCl or 50 μL of cyclic AMP solution (0-16 pmol/200 μL for standard curve). Bound radioactivity was separated by rapid filtration through Whatman GF/C filters and washed once with cold buffer. Bound radioactivity was measured by liquid scintillation spectrometry.

#### **[<sup>35</sup>S]GTPγS binding assay**

[<sup>35</sup>S]GTPγS binding was measured by a variation of the method described (Jacobson *et al.*, *J. Med. Chem.* **2000**, *43*, 2196-2203). Each assay tube consisted of 200 μL buffer containing 50 mM Tris HCl (pH 7.4), 1 mM EDTA, 1 mM MgCl<sub>2</sub>, 1 μM GDP, 1 mM dithiothreitol, 100 mM NaCl, 3 U/ml ADA, 0.2 nM [<sup>35</sup>S]GTPγS, 0.004% 3-[(3-cholamidopropyl) dimethylammonio]propanesulfonate (CHAPS), and 0.5% bovine serum albumin. Incubations were started upon addition of the membrane suspension (CHO cells stably expressing the native human A<sub>3</sub>AR, 5 μg protein/tube) to the test tubes, and they were carried out in duplicate for 30 min at 25°C. The reaction was stopped by rapid filtration through Whatman GF/B filters, pre-soaked in 50 mM Tris HCl, 5 mM MgCl<sub>2</sub> (pH 7.4) containing 0.02% CHAPS. The filters were washed twice with 3 mL of the same buffer, and retained radioactivity was measured using liquid scintillation counting. Non-specific binding of [<sup>35</sup>S]GTPγS was measured in the presence of 10 μM unlabelled GTPγS.

#### **Statistical analysis**

Binding and functional parameters were calculated using Prism 4.0 software (GraphPAD, San Diego, CA, USA). IC<sub>50</sub> values obtained from competition curves were converted to K<sub>i</sub> values using the Cheng-Prusoff equation (Cheng and Prusoff, *Biochem. Pharmacol.* **1973**, *22*, 3099-3108). Data were expressed as mean ± standard error.

### **Elemental Analyses Data**

Compound **9**: Anal. Calcd for  $C_{12}H_{13}ClN_4O_2S$ : C, 46.08; H, 4.19; N, 17.91; S, 10.25  
Found: C, 46.44; H, 4.08; N, 17.99; S, 10.12.

Compound **10**: Anal. Calcd for  $C_9H_9ClN_4O_2S$ : C, 39.64; H, 3.33; N, 20.54; S, 11.76.  
Found: C, 39.87; H, 3.12; N, 20.14; S, 11.57.

Compound **7a**: Anal. calcd for  $C_{10}H_{13}N_5O_2S$ : C, 44.93; H, 4.90; N, 26.20; S, 12.00.  
Found: C, 44.89; H, 5.08; N, 25.85; S, 11.73.

Compound **7b**: Anal. Calcd for  $C_{16}H_{16}FN_5O_2S$ : C, 53.17; H, 4.46; N, 19.38; S, 8.87.  
Found: C, 53.42; H, 4.47; N, 19.49; S, 8.50.

Compound **7c**: Anal. Calcd for  $C_{16}H_{16}ClN_5O_2S$ : C, 50.86; H, 4.27; N, 18.53; S, 8.49.  
Found: C, 51.51; H, 4.32; N, 18.48; S, 8.35.

Compound **7d**: Anal. Calcd for  $C_{16}H_{16}BrN_5O_2S$ : C, 45.51; H, 3.82; N, 16.58; S, 7.59.  
Found: C, 45.57; H, 3.83; N, 16.58; S, 7.57.

Compound **7e**: Anal. Calcd for  $C_{16}H_{16}IN_5O_2S$ : C, 40.95; H, 3.44; N, 14.92; S, 6.83.  
Found: C, 41.04; H, 3.43; N, 14.82; S, 6.81.

Compound **7f**: Anal. Calcd for  $C_{16}H_{15}BrClN_5O_2S$ : C, 42.07; H, 3.31; N, 15.33; S, 7.02.  
Found: C, 42.08; H, 3.30; N, 15.57; S, 7.01.

Compound **7g**: Anal. Calcd for  $C_{16}H_{15}ClIN_5O_2S$ : C, 38.15; H, 3.00; N, 13.90; S, 6.37.  
Found: C, 38.10; H, 3.40; N, 13.76; S, 6.33.
